# Supplementary material for: Formation of DY center as n-type limiting defects in octahedral semiconductors: the case of Bi-doped hybrid halide perovskites
Source: Royal Society of Chemistry journal article supplement (doi:10.1039/c8tc06222f), 2019-01-01
Supplement: c8tc06222f1.pdf [file c8tc06222f1.pdf]

**Supplementary Information :**  
**Formation of the DY center as n-type limiting defect in Bi-Doped Hybrid Halide Perovskites**

*Jin-Ling Li<sup>1,2</sup>, Jingxiu Yang<sup>2\*</sup>, Tom Wu<sup>3\*</sup>, and Su-Huai Wei<sup>2\*</sup>*

<sup>1</sup> International Center for Quantum Materials, School of Physics, Peking University,  
Beijing 100871, China

<sup>2</sup> Beijing Computational Science Research Center, Beijing, 100193, China

<sup>3</sup> School of Materials Science and Engineering, University of New South Wales  
(UNSW), Sydney, NSW 2052, Australia

AUTHOR INFORMATION

**Corresponding Author**

\* Jingxiu Yang, Email: yangjingxiu@csrc.ac.cn

\* Tom Wu, Email: tom.wu@unsw.edu.au

\* Su-Huai Wei, Email: suhuaiwei@csrc.ac.cn

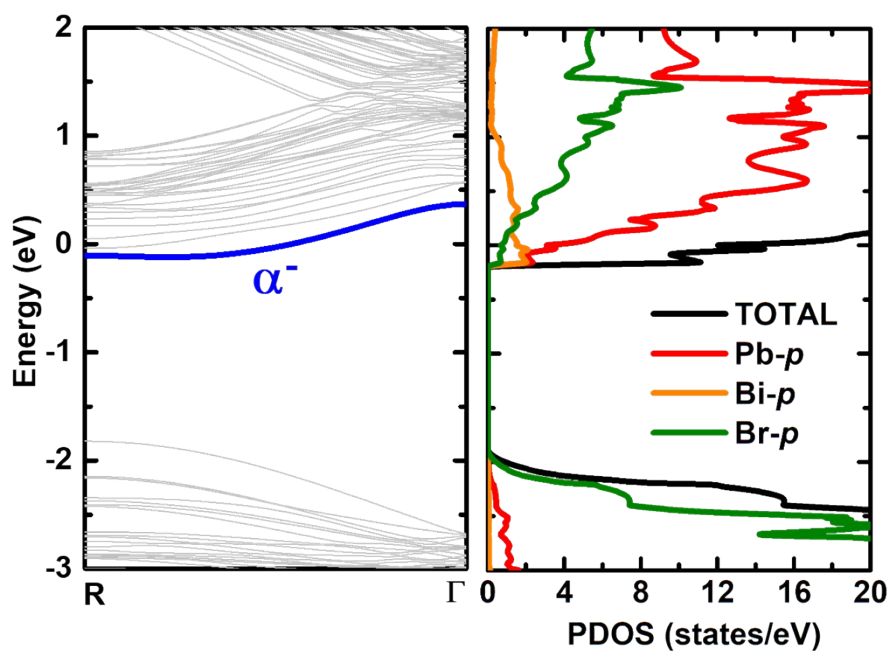

**Figure S1.** The band structure and partial density of states (PDOS) of the  $\alpha^-$  state in the Bi-doped MAPbBr<sub>3</sub>.

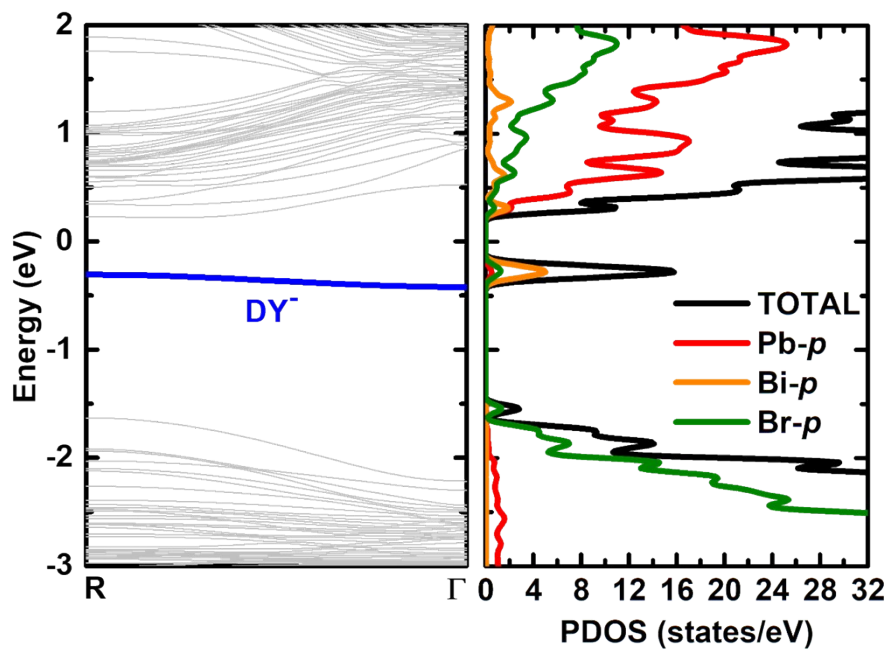

**Figure S2.** The band structure and partial density of states (PDOS) of the  $DY^-$  state in the Bi-doped MAPbBr<sub>3</sub>.

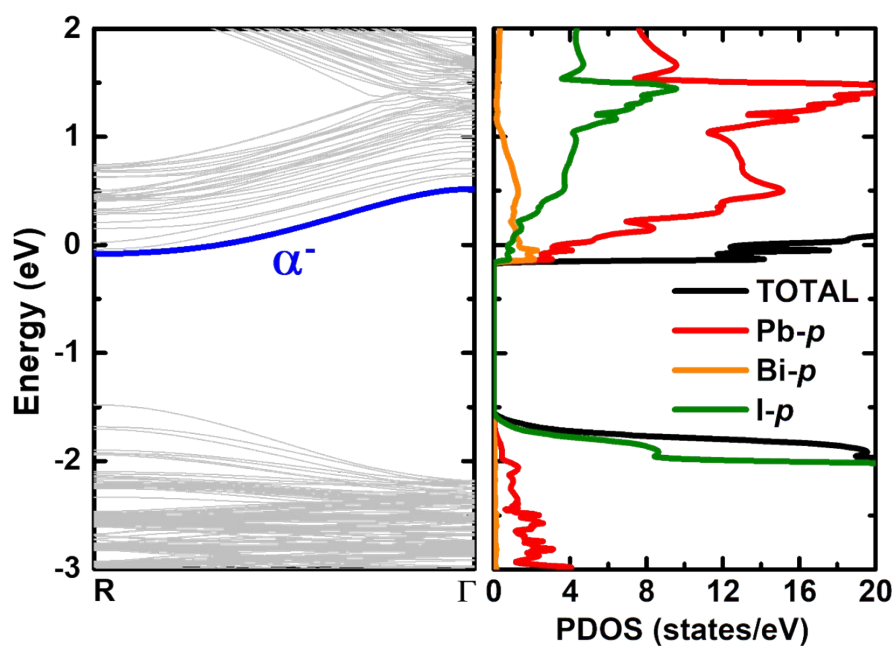

**Figure S3.** The band structure and partial density of states (PDOS) of the  $\alpha^-$  state in the Bi-doped MAPbI<sub>3</sub>.

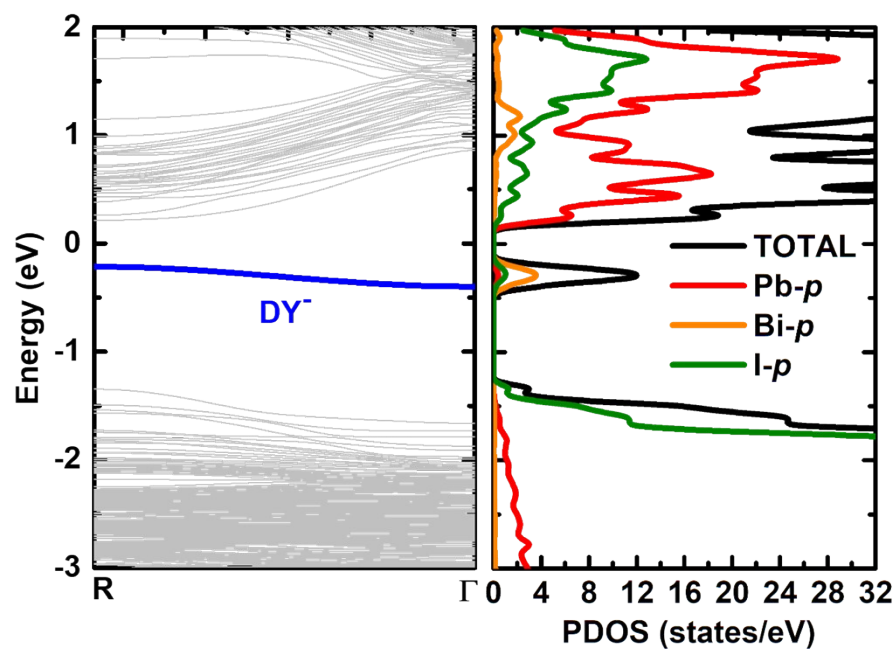

**Figure S4.** The band structure and partial density of states (PDOS) of the  $DY^-$  state in the Bi-doped MAPbI<sub>3</sub>.
